# Supplementary material
Source: PubMed Central journal article supplement (PMC8102374)
Supplement: NIHMS1676648-supplement-1.pdf [file NIHMS1676648-supplement-1.pdf]

## **APPENDIX**

### *Supplemental methods*

#### Annual mortality rates

To investigate whether the mortality rate fluctuates with PM<sub>2.5</sub> levels, annual mortality rates between 2010-2016 were calculated among our study population. Mortality rate was calculated by the function below:

$$\text{Annual mortality rate} = \frac{\text{Number of deaths within a year}}{\text{Total number person} - \text{year of that year}}$$

The mortality rate was calculated among the overall analytic population and among those who resided in California separately. We did not calculate the mortality for 2017 because data for PM<sub>2.5</sub> level was only available through 2016.

Supplemental tables

Table S1. Associations between PM<sub>2.5</sub> and mortality among older (aged≥65) patients initiating dialysis (N=384,276).

|                                    | HR (95%CI)                             |                                        | p for slope difference |
|------------------------------------|----------------------------------------|----------------------------------------|------------------------|
|                                    | PM <sub>2.5</sub> ≤12µg/m <sup>3</sup> | PM <sub>2.5</sub> >12µg/m <sup>3</sup> |                        |
| <b>All-cause mortality</b>         |                                        |                                        |                        |
| <b>Comorbidity Model</b>           | 1.00 (0.98-1.03)                       | 1.14 (1.08-1.21)                       | 0.001                  |
| <b>Model for 3-month survivors</b> | 1.00 (0.97-1.02)                       | 1.14 (1.05-1.23)                       | 0.002                  |
| <b>Model for 6-month survivors</b> | 0.98 (0.96-1.00)                       | 1.11 (1.02-1.21)                       | 0.006                  |
| <b>Model for California only</b>   | 0.97 (0.89-1.05)                       | 1.22 (1.11-1.35)                       | 0.001                  |
| <b>Model for other states</b>      | 1.02 (1.00-1.05)                       | 1.16 (1.00-1.34)                       | 0.1                    |
| <b>Cause-specific mortality</b>    |                                        |                                        |                        |
| <b>CVD</b>                         | 0.97 (0.93-1.02)                       | 1.38 (1.21-1.58)                       | <0.001                 |
| <b>Other</b>                       | 0.91 (0.89-0.93)                       | 0.95 (0.89-1.01)                       | 0.267                  |
| <b>Unknown</b>                     | 1.65 (1.55-1.76)                       | 1.33 (1.14-1.55)                       | 0.015                  |

HR: Hazard Ratio for mortality per 10 µg/m<sup>3</sup> increase in PM<sub>2.5</sub>; p for slope difference indicated the p effect difference of per 10 µg/m<sup>3</sup> increase in PM<sub>2.5</sub> between areas with PM<sub>2.5</sub>≤12 and areas with PM<sub>2.5</sub>>12

CVD: Cardiovascular disease

All the listed models were adjusted for demographics (age, sex, race), ZIP-code level characteristics (percent below 200% of the federal poverty line, mean years of education, median household income, median housing cost per month, percent Black, percent Hispanics, population density and urbanicity), and health related factors (cause of kidney failure, smoking status, BMI and nephrology care status). Comorbidity model was further adjusted for cardiovascular disease, chronic pulmonary obstructive disease and cancer.

Model for 3-month survivors included 341,655 patients who survived the first three months of dialysis, Model for 6-month survivors included 311,684 patients who survived the first six months of dialysis

Model for California only included 47,028 older patients, Model3 for other states included 337,248 older patients, other models included all 384,276 older patients. California was analyzed separately because more than 50% of the older patients with  $PM_{2.5}$  exposure level higher than  $12 \mu\text{g}/\text{m}^3$  came from California.

Table S2. Mortality rate and PM<sub>2.5</sub> level by year among older (aged≥65) patients initiating dialysis (2010-2016) (N=384,276).

| year        | Overall      |             |       |                | California   |             |       |                |
|-------------|--------------|-------------|-------|----------------|--------------|-------------|-------|----------------|
|             | median PM2.5 | person-year | death | mortality rate | median PM2.5 | person-year | death | mortality rate |
| <b>2010</b> | 9.0          | 23815       | 10080 | 0.423          | 10.5         | 2932        | 1105  | 0.377          |
| <b>2011</b> | 9.9          | 39800       | 20519 | 0.516          | 10.9         | 5014        | 2272  | 0.453          |
| <b>2012</b> | 9.0          | 67507       | 26408 | 0.391          | 10.8         | 8682        | 2869  | 0.330          |
| <b>2013</b> | 9.0          | 89316       | 31741 | 0.355          | 11.7         | 11624       | 3597  | 0.309          |
| <b>2014</b> | 9.0          | 108387      | 36188 | 0.334          | 11.7         | 14431       | 4009  | 0.278          |
| <b>2015</b> | 10.0         | 123745      | 40910 | 0.331          | 14.3         | 16676       | 4766  | 0.286          |
| <b>2016</b> | 8.7          | 138067      | 44020 | 0.319          | 14.5         | 18776       | 5084  | 0.271          |

Mortality rates were presented as death/person-year
